# Supplementary material
Source: publisher figshare collection journal article supplement (https://acs.figshare.com/ndownloader/files/3867316)
Supplement: Supplementary file 1 [file 3867316]

# Fast Identification of Novel Lymphoid Tyrosine Phosphatase Inhibitors Using Target-Ligand Interaction-Based Virtual Screening

## Supplementary Material

*Xuben Hou,<sup>†,‡</sup> Rong Li,<sup>‡,‡</sup> Kangshuai Li,<sup>§</sup> Xiao Yu,<sup>§</sup> Jin-peng Sun,<sup>‡,\*</sup> and Hao Fang<sup>†,\*</sup>*

### Contents:

|                                                                                                                               |     |
|-------------------------------------------------------------------------------------------------------------------------------|-----|
| 1. Chemical structures of inactive compounds.                                                                                 | S2  |
| 2. Lyp inhibition, ranks, MS data and purity for selected 29 compounds                                                        | S3  |
| 3. MS data and HPLC purity for derivatives of <b>A15</b> and <b>A19</b> .                                                     | S4  |
| 4. The Lineweaver-Burk plots of <b>A3</b> , <b>A6</b> , <b>A17</b> and <b>A22</b> .                                           | S4  |
| 5. Structure similarity analyze of nine novel inhibitors.                                                                     | S5  |
| 6. Redock studies using Lyp- <b>8b</b> co-crystal structure.                                                                  | S6  |
| 7. Calculated molecular properties of <b>A2</b> , <b>A15</b> , <b>A19</b> and <b>A26</b> .                                    | S6  |
| 8. IC <sub>50</sub> curves for the four most active hits against a panel of protein phosphatases.                             | S7  |
| 9. Reversible binding of compounds <b>A2</b> , <b>A3</b> , <b>A15</b> , <b>A19</b> , <b>A22</b> , <b>A25</b> and <b>A26</b> . | S12 |
| 10. Kinetic parameters for covalent Lyp inhibitor <b>A25</b> .                                                                | S13 |
| 11. Proposed binding modes of <b>A3</b> , <b>A6</b> , <b>A17</b> , <b>A22</b> and <b>A25</b> .                                | S14 |
| 12. Pharmacophore mapping of active hits.                                                                                     | S14 |
| 13. Protein phosphatases quality assurance.                                                                                   | S15 |
| 14. <sup>1</sup> H NMR spectra for active compounds.                                                                          | S16 |

# 1. Chemical structures of inactive compounds.

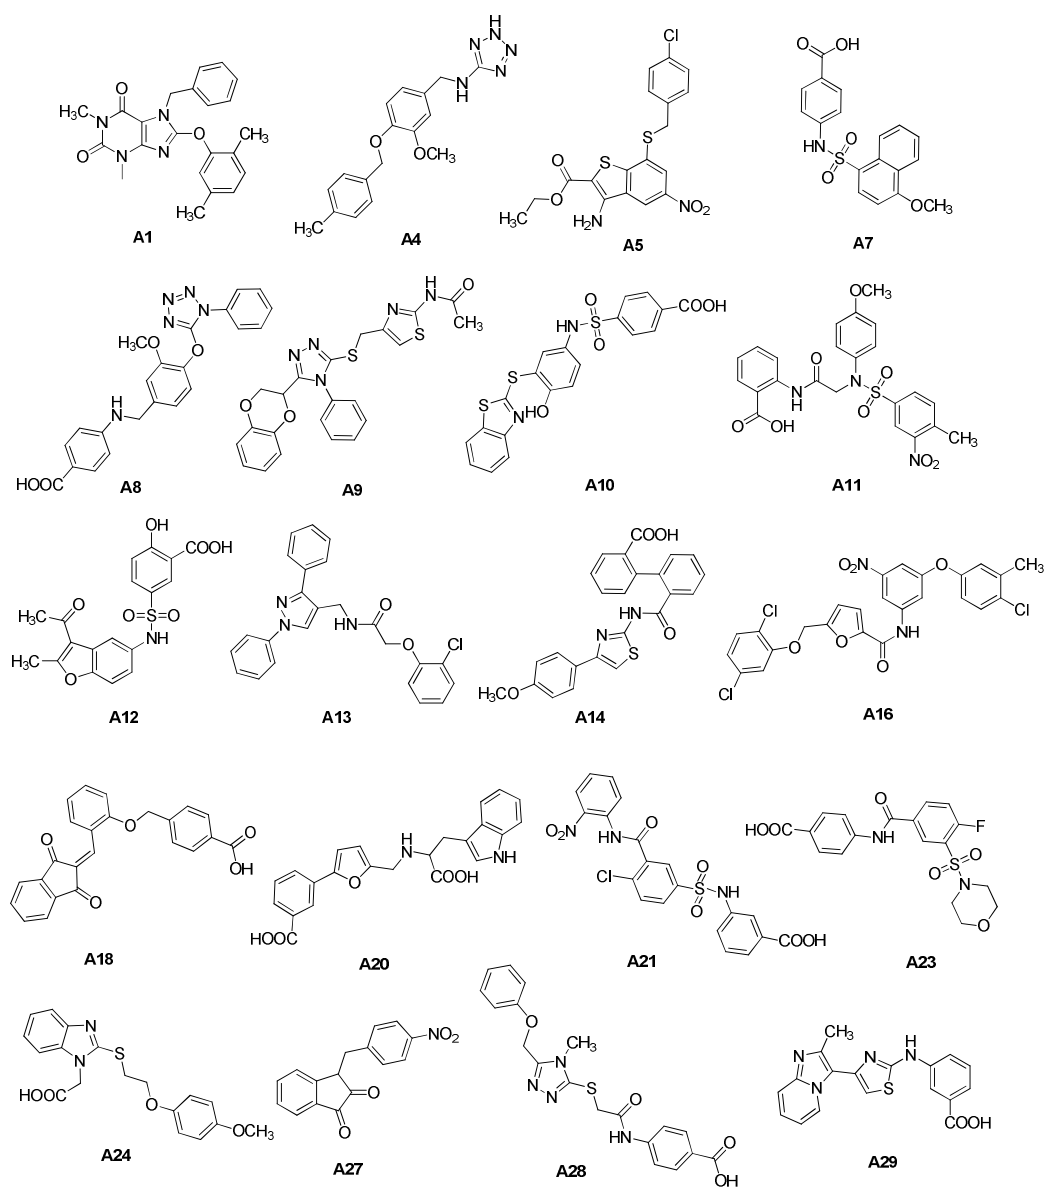

Figure S1. Chemical structures of selected compounds with IC<sub>50</sub> higher than 100  $\mu$  M

## 2. Lyp inhibition, ranks, MS data and purity for selected 29 compounds.

**Table S1. Docking-based rankings, MS data and purity data.**

| Name | Specs ID <sup>a</sup> | GoldScore Fitness | IC <sub>50</sub> ( $\mu$ M)    | Rank | ES-MS Positive (m/z) <sup>a</sup> | t <sub>R</sub> (min) <sup>a</sup>    | HPLC purity (%) <sup>a</sup> |
|------|-----------------------|-------------------|--------------------------------|------|-----------------------------------|--------------------------------------|------------------------------|
| A1   | AO-343/41781084       | 56.67             | >60                            | 195  | 391.2                             | 4.39                                 | >95.0                        |
| A2   | AE-641/37091012       | 61.75             | <b>11.4<math>\pm</math>0.7</b> | 109  | 499.3                             | 3.57                                 | >95.0                        |
| A3   | AO-299/41409126       | 59.41             | <b>31.6<math>\pm</math>6.8</b> | 111  | 434.3                             | 3.97                                 | 96.74                        |
| A4   | AN-465/42888694       | 51.95             | >60                            | 214  | 326.24                            | 3.25                                 | >95.0                        |
| A5   | AK-968/41922688       | 68.64             | >60                            | 59   | 423.1                             | 5.21                                 | 97.61                        |
| A6   | AN-023/13177206       | 72.89             | <b>30.5<math>\pm</math>9.1</b> | 52   | 462.2                             | 4.01                                 | >95.0                        |
| A7   | AP-263/43371386       | 62.57             | >60                            | 92   | 357.07                            | 3.2                                  | >95.0                        |
| A8   | AN-465/43384104       | 75.47             | >60                            | 29   | 418.3                             | 3.72                                 | >95.0                        |
| A9   | AO-080/43441851       | 59.70             | >60                            | 63   | 465.93                            | 0.84                                 | >95.0                        |
| A10  | AQ-390/42869319       | 64.24             | >60                            | 41   | 459.2                             | 3.23                                 | >95.0                        |
| A11  | AG-690/15429642       | 64.40             | >60                            | 45   | 500.4                             | 3.99                                 | 96.94                        |
| A12  | AQ-390/43238281       | 53.64             | >60                            | 201  | 390.3                             | 3.48                                 | >95.0                        |
| A13  | AK-968/40940879       | 58.78             | >60                            | 147  | 418.5                             | 4.44                                 | >95.0                        |
| A14  | AG-690/09684006       | 67.64             | >60                            | 55   | 431.1                             | 4.03                                 | >95.0                        |
| A15  | AO-081/15385001       | 58.88             | <b>6.1<math>\pm</math>1.1</b>  | 84   | 598.3                             | 4.81                                 | >95.0                        |
| A16  | AK-968/41925005       | 69.58             | >60                            | 45   | -                                 | <sup>1</sup> H-NMR data <sup>b</sup> |                              |
| A17  | AK-968/15256501       | 80.26             | <b>36.6<math>\pm</math>7.7</b> | 31   | -                                 | <sup>1</sup> H-NMR data <sup>b</sup> |                              |
| A18  | AM-879/40965082       | 77.32             | >60                            | 18   | 358.0                             | 4.15                                 | 96.41                        |
| A19  | AQ-088/42014071       | 52.97             | <b>18.5<math>\pm</math>3.1</b> | 152  | 589.9                             | 4.53                                 | 96.16                        |
| A20  | AN-465/43411028       | 66.81             | >60                            | 89   | 405.13                            | 0.57                                 | 97.04                        |
| A21  | AH-034/11365849       | 71.99             | >60                            | 15   | 476.0                             | 3.56                                 | >95.0                        |
| A22  | AN-465/14952274       | 68.50             | <b>37.1<math>\pm</math>7.2</b> | 71   | 441.0                             | 4.96                                 | 99.34                        |
| A23  | AG-205/12140185       | 62.54             | >60                            | 124  | 409.2                             | 3.27                                 | >95.0                        |
| A24  | AG-690/36897006       | 53.37             | >60                            | 248  | -                                 | <sup>1</sup> H-NMR data <sup>b</sup> |                              |
| A25  | AF-399/42048252       | 68.01             | <b>55.9<math>\pm</math>4.4</b> | 57   | 436.4                             | 3.76                                 | >95.0                        |
| A26  | AN-648/42098518       | 54.93             | <b>20.5<math>\pm</math>3.3</b> | 77   | 493.1                             | 4.00                                 | 96.74                        |
| A27  | AG-690/09407063       | 55.50             | >60                            | 159  | -                                 | <sup>1</sup> H-NMR data <sup>b</sup> |                              |
| A28  | AN-698/42147479       | 52.44             | >60                            | 217  | 399.2                             | 3.08                                 | >95.0                        |
| A29  | AG-205/13579050       | 55.01             | >60                            | 135  | 351.1                             | 0.40                                 | >95.0                        |

<sup>a</sup> The chemical structures MS data and HPLC data are available on the Specs website ([www.specs.net](http://www.specs.net)).

<sup>b</sup> Purities were confirmed using <sup>1</sup>H-NMR, data available on the Specs website ([www.specs.net](http://www.specs.net)).

### 3. MS data and HPLC purity for derivatives of A15 and A19.

**Table S2. Lyp inhibition, MS data and purity data for derivatives of A15 and A19.**

| Name  | Specs ID <sup>a</sup> | IC <sub>50</sub> ( $\mu$ M)      | ES-MS Positive (m/z) <sup>a</sup> | t <sub>R</sub> (min) <sup>a</sup>    | HPLC purity (%) <sup>a</sup> |
|-------|-----------------------|----------------------------------|-----------------------------------|--------------------------------------|------------------------------|
| A15-1 | AN-648/15596073       | <b>42.0<math>\pm</math>13.7</b>  | 479.3                             | 4.96                                 | 97.9                         |
| A15-2 | AN-648/14910004       | <b>36.5<math>\pm</math>12.0</b>  | 479.3                             | 4.01                                 | >99                          |
| A15-3 | AN-648/15596181       | <b>79.5<math>\pm</math>13.0</b>  | 556.0                             | 3.81                                 | >99                          |
| A15-4 | AH-487/11778085       | >100                             | -                                 | <sup>1</sup> H-NMR data <sup>b</sup> |                              |
| A15-5 | AN-648/15596202       | <b>7.1<math>\pm</math>2.6</b>    | 615.3                             | 4.47                                 | 97.6                         |
| A19-1 | AQ-088/41967335       | <b>39.2<math>\pm</math>4.9</b>   | 568.1                             | 4.28                                 | >99                          |
| A19-2 | AQ-088/41967395       | <b>41.7<math>\pm</math>3.4</b>   | 644.1                             | 5.01                                 | 97.0                         |
| A19-3 | AQ-088/42014085       | <b>41.36<math>\pm</math>12.7</b> | 598.1                             | 4.73                                 | >99                          |
| A19-4 | AQ-088/42014093       | <b>27.6<math>\pm</math>7.6</b>   | 578.2                             | 4.76                                 | 90.8                         |
| A19-5 | AQ-088/42014116       | >100                             | 460.1                             | 4.12                                 | 95.4                         |
| A19-6 | AG-205/36485033       | <b>48.7<math>\pm</math>10.4</b>  | 536.0                             | 4.62                                 | >99                          |
| A19-7 | AQ-088/41085728       | >100                             | 398.3                             | 3.24                                 | >99                          |
| A19-8 | AG-205/12230087       | >100                             | 504.0                             | 4.42                                 | 97.9                         |
| A19-9 | AG-205/36915235       | >100                             | 639.3                             | 3.83                                 | >99                          |

<sup>a</sup> The chemical structures MS data and HPLC data are available on the Specs website ([www.specs.net](http://www.specs.net)).

<sup>b</sup> Purities were confirmed using <sup>1</sup>H-NMR, data available on the Specs website ([www.specs.net](http://www.specs.net)).

### 4. The Lineweaver-Burk plots of A3, A6, A17 and A22.

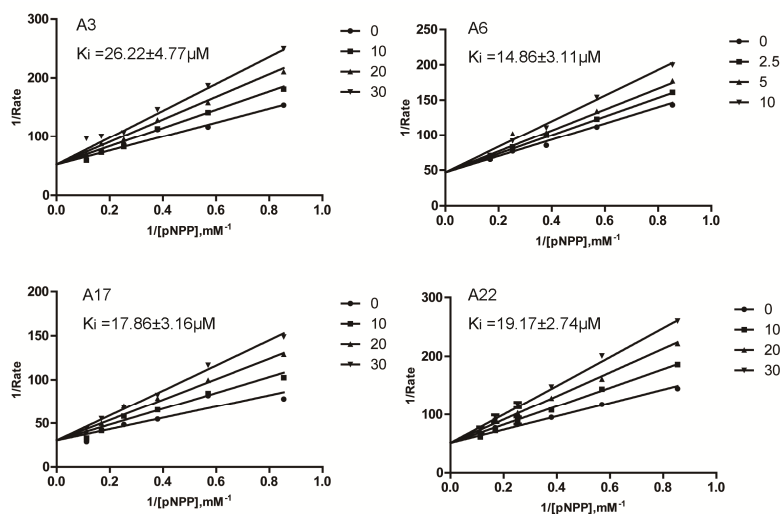

**Figure S2. Kinetic analysis of Lyp inhibition by A3, A6, A17 and A22.** The Lineweaver-Burk plot displayed the characteristic pattern of intersecting lines, which indicates competitive inhibition. The experiments were conducted at 25 °C, pH 7.0, with an ionic strength of 0.15 M, adjusted by NaCl.

## 5. Structure similarity analyze of nine novel inhibitors

To evaluate the novelty of these nine inhibitors with respect to known Lyp inhibitors (**8b**<sup>1</sup>, **I-C11**<sup>2</sup>, **LTV-1**<sup>3</sup> and **4e**<sup>4</sup>), the Tanimoto similarity indices (T)<sup>5, 6</sup> based on the FCFP\_4 fingerprints were calculated using Fingerprints protocol in Discovery Studio 2.5. The Tanimoto coefficient is the well-known method of choice for the computation of fingerprint-based similarity in terms of a distance measure, giving values in the range of zero (no bits in common) to unity (all bits the same). Typically, structures with  $T > 0.85$  are considered similar.<sup>7</sup> The results showed that these nine inhibitors all have low Tanimoto similarity values (less than 0.3) compared with the known inhibitors (Table S2).

**Table S3. Similarity of nine novel inhibitors compared with four known Lyp inhibitors**

|            | Tanimoto similarity (T) <sup>a</sup> |              |              |           |
|------------|--------------------------------------|--------------|--------------|-----------|
|            | <b>8b</b>                            | <b>I-C11</b> | <b>LTV-1</b> | <b>4e</b> |
| <b>A2</b>  | 0.19                                 | 0.11         | 0.17         | 0.06      |
| <b>A3</b>  | 0.16                                 | 0.11         | 0.19         | 0.13      |
| <b>A6</b>  | 0.14                                 | 0.13         | 0.05         | 0.07      |
| <b>A15</b> | 0.11                                 | 0.07         | 0.27         | 0.06      |
| <b>A17</b> | 0.15                                 | 0.14         | 0.12         | 0.09      |
| <b>A19</b> | 0.13                                 | 0.09         | 0.18         | 0.12      |
| <b>A22</b> | 0.15                                 | 0.12         | 0.10         | 0.10      |
| <b>A25</b> | 0.14                                 | 0.09         | 0.15         | 0.08      |
| <b>A26</b> | 0.18                                 | 0.08         | 0.28         | 0.07      |

<sup>a</sup> Tanimoto similarity were calculated following equation S1:

$$SA/(SA+SB+SC) \quad (\text{Eq S1})$$

(*SA*: The number of bits present in both the target and the reference; *SB*: The number of bits in the target but not the reference; *SC*: The number of bits in the reference but not the target.)

## 6. Redock studies using Lyp-8b co-crystal structure.

Table S4. RMSDs calculated between crystal structure and docked conformations.

| Docking Program | Score Functions | RMSD |
|-----------------|-----------------|------|
| LigandFit       | LigScore-1      | 9.21 |
|                 | LigScore-2      | 9.21 |
|                 | PLP1            | 9.15 |
|                 | PLP2            | 9.21 |
|                 | Jain            | 9.43 |
|                 | PMF             | 9.10 |
|                 | DockScore       | 9.46 |
| Surflex         | TotalScore      | 2.23 |
| Gold            | GoldScore       | 1.54 |
|                 | ChemScore       | 4.57 |
| Glide           | G-Score(HTVs)   | 1.55 |
|                 | G-Score(SP)     | 1.71 |

## 7. Calculated molecular properties of A2, A15, A19 and A26.

Table S5. LogP and PSA values of active compounds as well as reported inhibitors.

| Compound                  | A2     | A15     | A19     | <b>8b</b> | <b>LTV-1</b> |
|---------------------------|--------|---------|---------|-----------|--------------|
| <b>XLogP</b> <sup>a</sup> | 4.65   | 1.89    | 1.85    | 2.78      | 3.04         |
| <b>ALogP</b> <sup>b</sup> | 7.251  | 5.811   | 5.869   | 3.802     | 5.229        |
| <b>PSA</b> <sup>c</sup>   | 70.638 | 125.363 | 140.074 | 121.874   | 125.299      |

<sup>a</sup> Calculated with XLogP version 3.0;

<sup>b</sup> Calculated with Discovery Studio version 2.5;

<sup>c</sup> Calculated with QikProp;

**8. IC<sub>50</sub> curves for the four most active hits against a panel of protein phosphatases. (IC<sub>50</sub> > 100μM were not shown)**

Graph shows concentration-dependent inhibition of the four most active hits against a panel of protein phosphatases. Plot shows the protein phosphatases-catalyzed hydrolysis of the pNPP versus inhibitor concentration. Lines are fitting of the data to Eq. 2 for the purpose of calculating the IC<sub>50</sub> values.

$$A_I = A_0 * IC_{50} / (IC_{50} + [I]) \quad \text{Eq. 2}$$

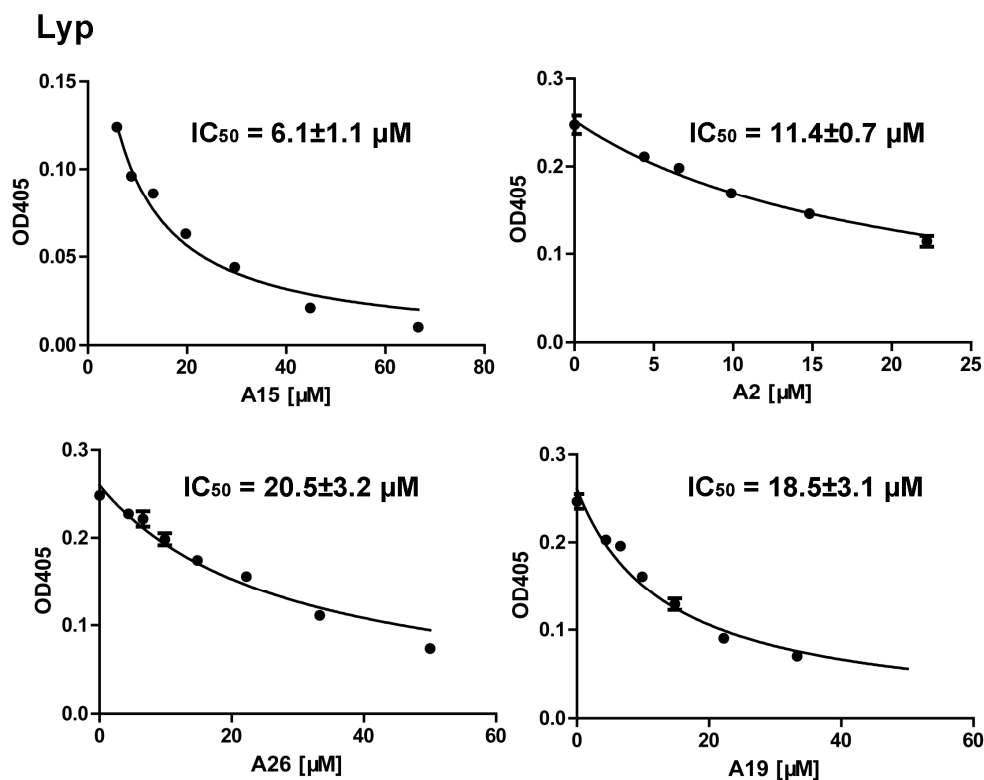

**Figure S3. Inhibition curves used to determine the IC<sub>50</sub> values for compound A15, A2, A26 and A19 against Lyp.**

## PTPN18

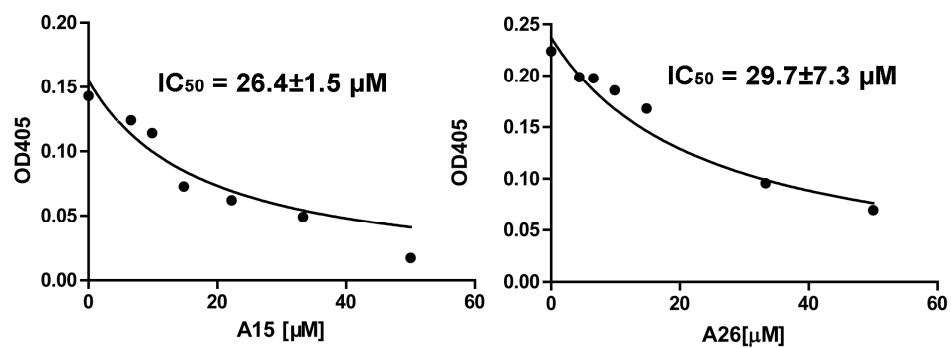

**Figure S4. Inhibition curves used to determine the  $IC_{50}$  values for compound A15 and A26 against PTPN18.**

## STEP

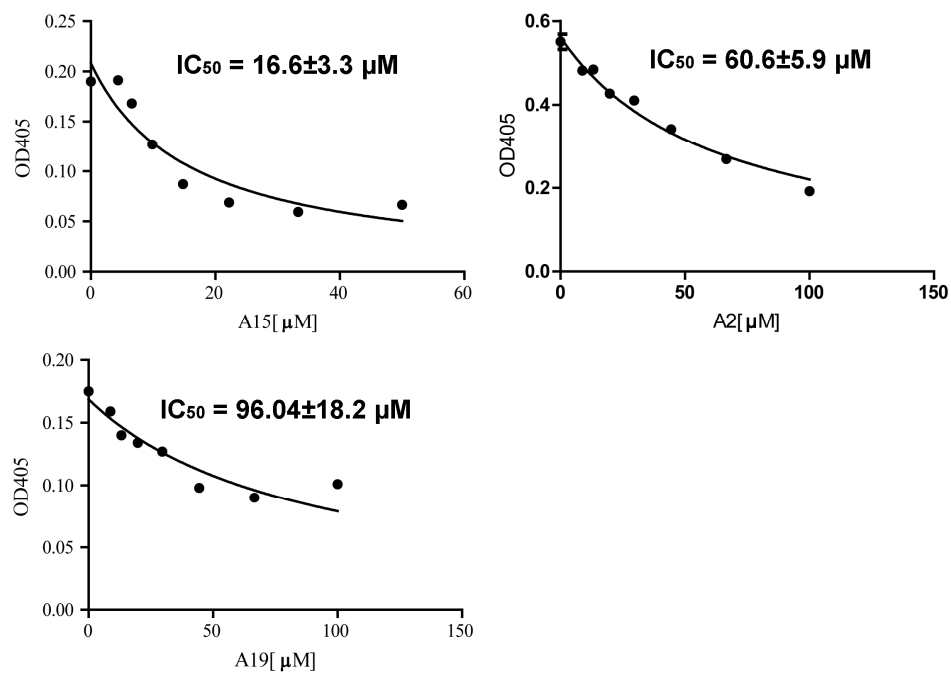

**Figure S5. Inhibition curves used to determine the  $IC_{50}$  values for compound A15, A2 and A19 against STEP.**



## MEG2

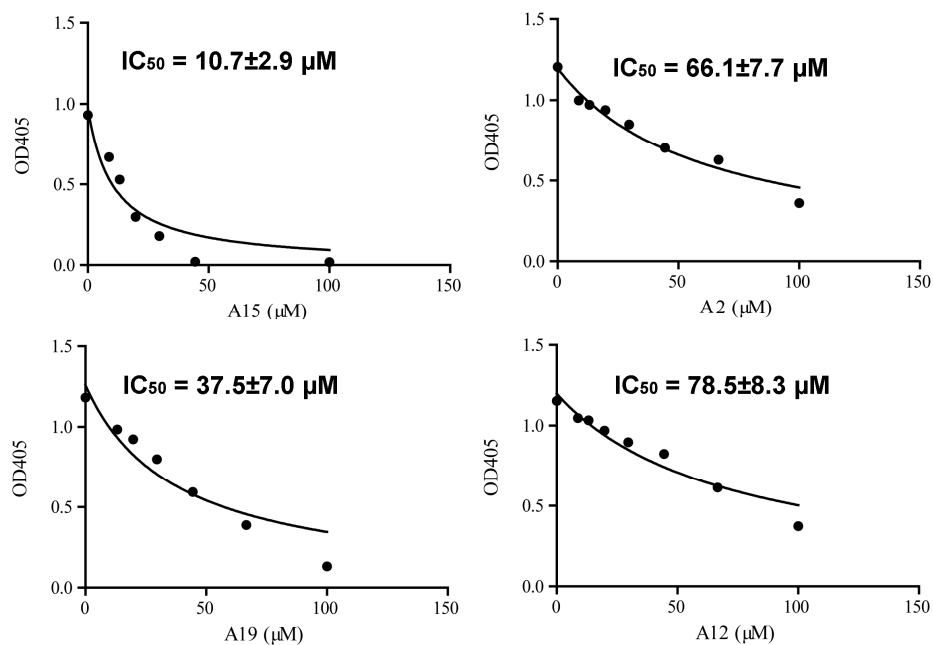

Figure S6. Inhibition curves used to determine the  $IC_{50}$  values for compound A15,

A2, A26 and A19 against MEG2.

## PTP1B

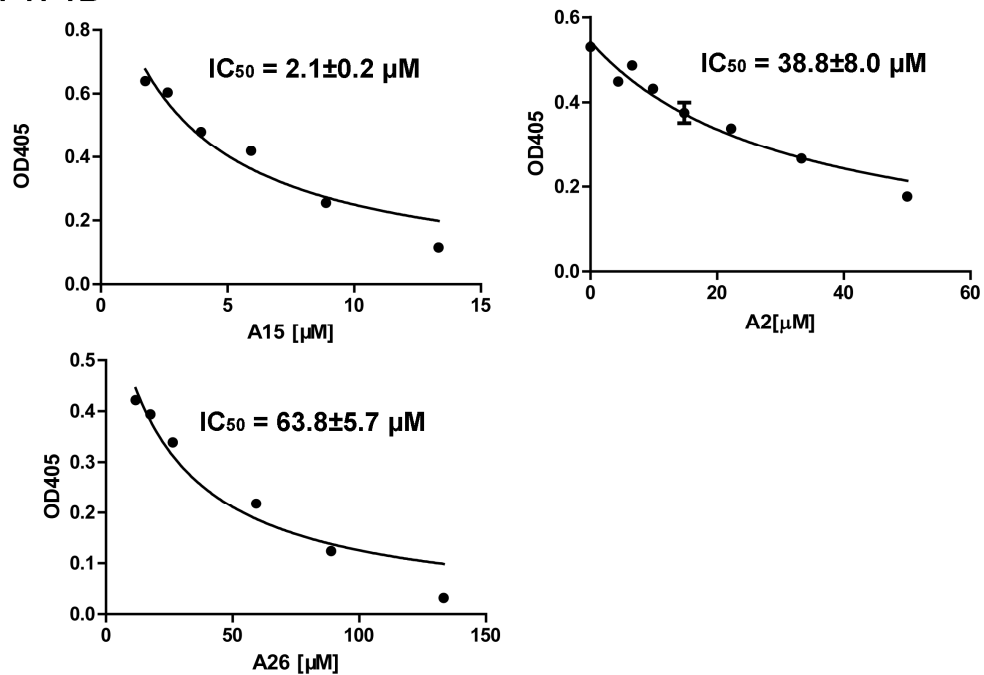

Figure S7. Inhibition curves used to determine the  $IC_{50}$  values for compound A15,

A2 and A26 against PTP1B.

## VHR

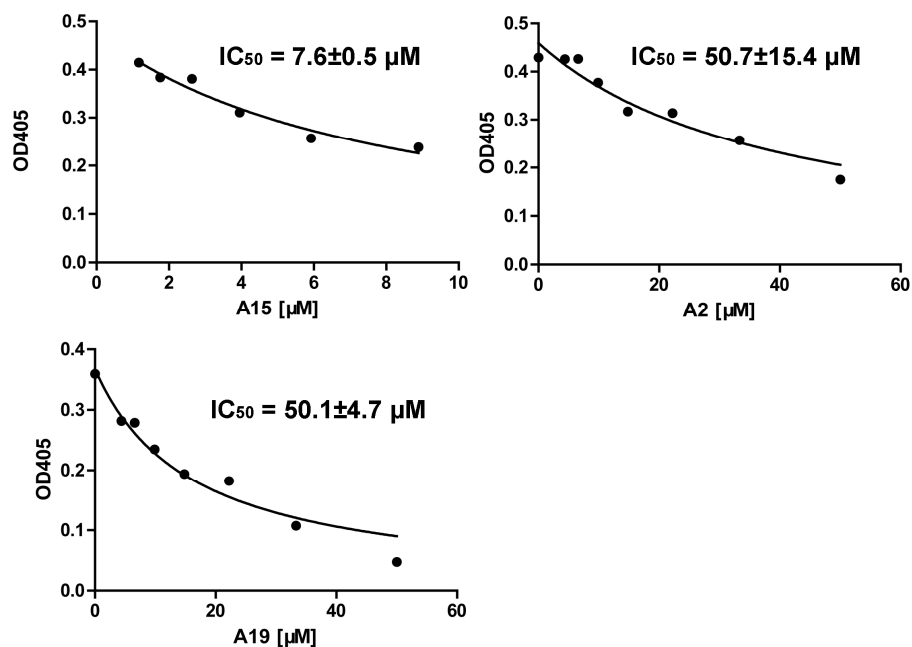

Figure S8. Inhibition curves used to determine the  $IC_{50}$  values for compound A15, A2 and A19 against VHR.

## PPM1A

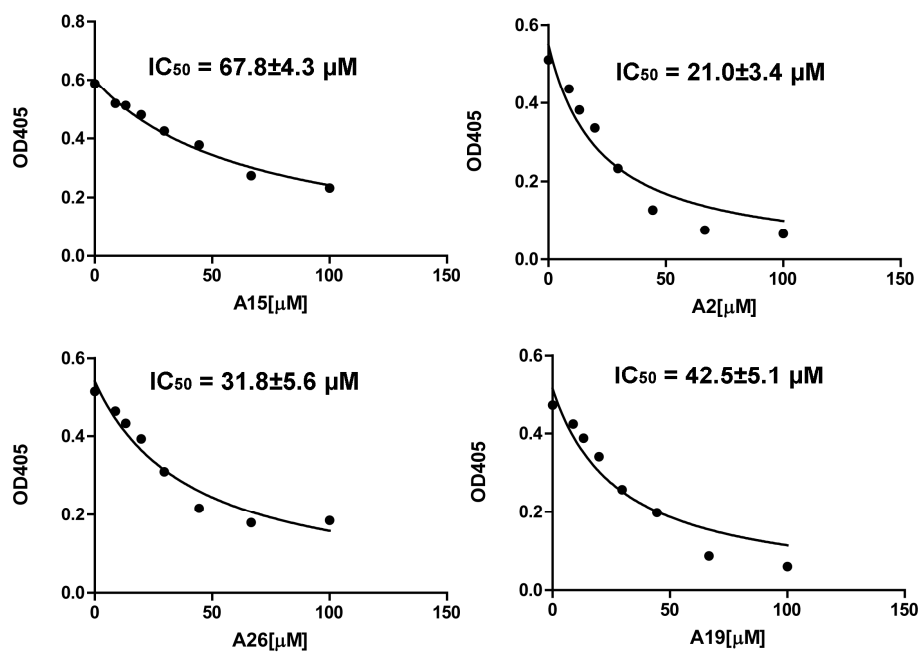

Figure S9. Inhibition curves used to determine the  $IC_{50}$  values for compound A15, A2, A26 and A19 against PPM1A.

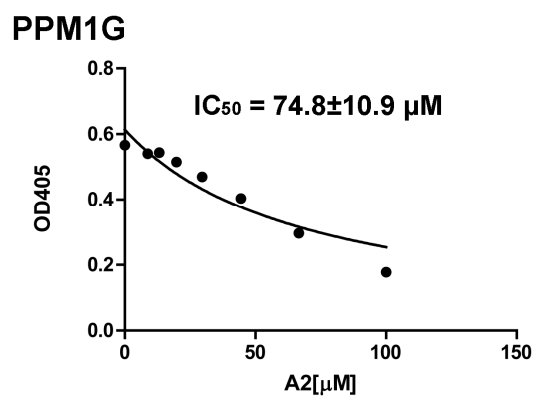

**Figure S10. Inhibition curves used to determine the IC<sub>50</sub> values for compound A2 against PPM1G.**

## 6. Reversible binding of compound A2, A3, A15, A19, A22, A25 and A26.

Reversible binding of seven compounds (A2, A3, A15, A19, A22, A25 and A26) were examined by varying the pre-incubation time of Lyp inhibitors, in order to determine whether there is a time-dependent inhibition. Lyp were pre-incubated with these inhibitors at a concentration of 40 $\mu$ M, and the time-dependent ratio of  $K_{cat}$  (control)/ $K_{cat}$  (inhibitor) were determined. Irreversibly binding could lead to the decrease of  $K_{cat}$  (inhibitor) as time, whereas the  $K_{cat}$  (inhibitor) remain constant when the inhibitor binding reversible<sup>9</sup>. As shown in Figure S11, most of these compounds bound Lyp reversibly with no increase in the ratio of  $K_{cat}$  (control) over  $K_{cat}$  (inhibitor) over 10–40 min of preincubation, except for compound A25, which showed covalent inhibition against Lyp.

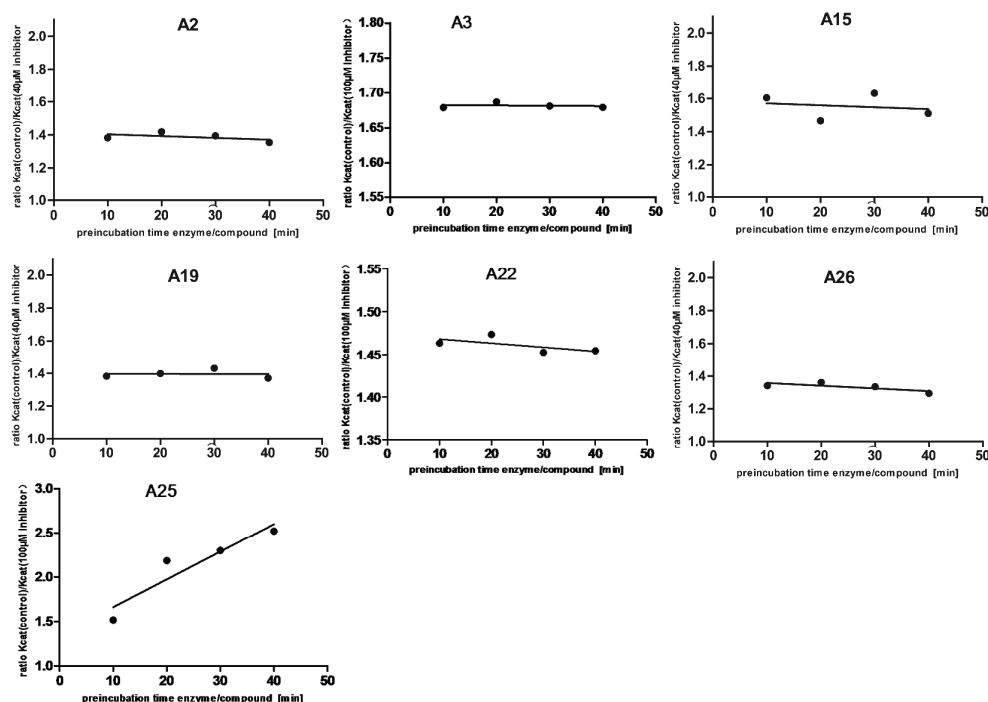

Figure S11. The time-dependent ratios of  $K_{cat}$  (control)/ $K_{cat}$  (inhibitor).

## 10. Kinetic parameters for covalent Lyp inhibitor A25.

Consider the fact that the Lyp inhibition by compound **A25** is time-dependent, we carried out a detailed kinetic analysis of the interaction between compound **A25** and the catalytic domain of Lyp. By fitting the  $k_{obs}$  values as a function of inhibitor concentration, we observed saturation kinetics as shown in Figure 2, and calculated the kinetic constants  $K_i=40.98\pm13.19$   $\mu\text{M}$  and  $k_{inact}=0.1263\pm0.0117$   $\text{min}^{-1}$  for compound **A25**.

### Method:

Lyp inactivation by **A25** was measured as described <sup>10</sup>. Inhibitor **A25** at various concentrations were added (30 $\mu\text{L}$ ) to the wells of a 96-well plate containing 50 mM 3,3-dimethylglutarate buffer, and the ionic strength of 0.15 M was adjusted with NaCl. A 30  $\mu\text{L}$  of Lyp in the same buffer was added to the wells. At appropriate time intervals, the reaction was initiated by addition of 4 Mm pNPP to a reaction mixture containing Lyp and **A25**, and stopped by addition of 1 M NaOH. The kinetic parameters of the inactivation reaction were obtained by fitting the data to the following equations:

$$\frac{A_t}{A_0} = \frac{A_\infty}{A_0} - \left( \frac{A_0 - A_\infty}{A_0} \right) e^{-K_{obs} \cdot t} \quad K_{obs} = \frac{k_{inact} \cdot [I]}{K_i + [I]}$$

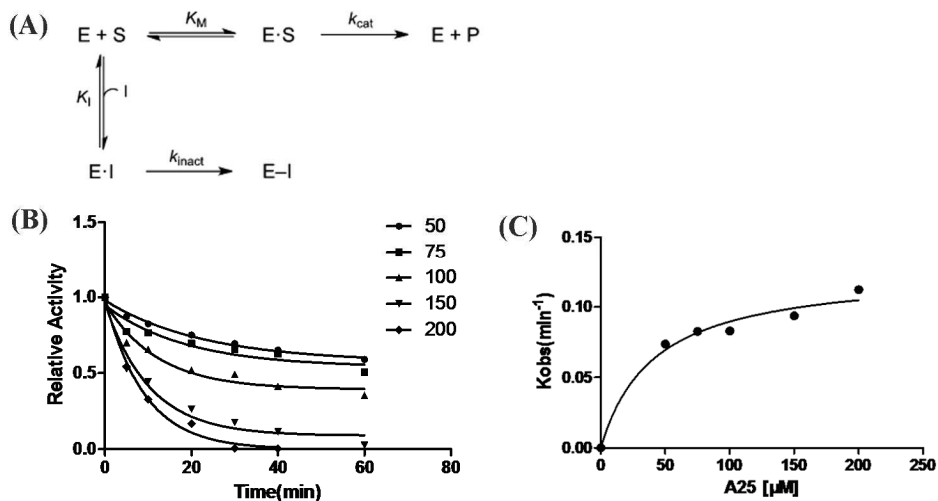

Figure S12. (A) Equation illustrating the irreversible inhibition of an enzyme. (B) Time-dependent inhibition of Lyp by compound A25. (C) The  $k_{obs}$  data of A25 at different concentrations.

## 11. Proposed binding modes of A3, A6, A17, A22 and A25.

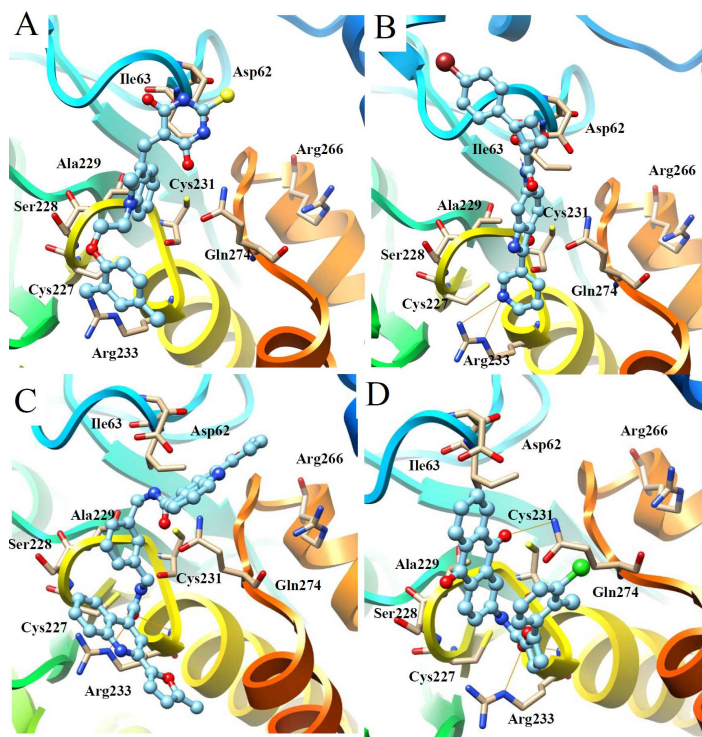

Figure S13. Proposed binding modes of A3 (A), A6 (B), A17 (C), A22 (D) and A25 (E).

## 12. Pharmacophore mapping of A15, A2, A19 and A26.

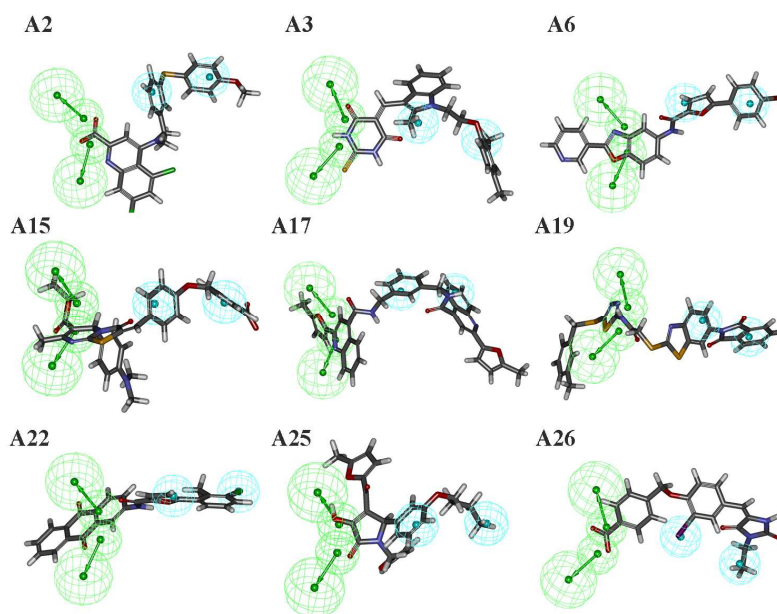

Figure S14. Pharmacophore mapping of nice active hits.

### 13. Protein phosphatases quality assurance.

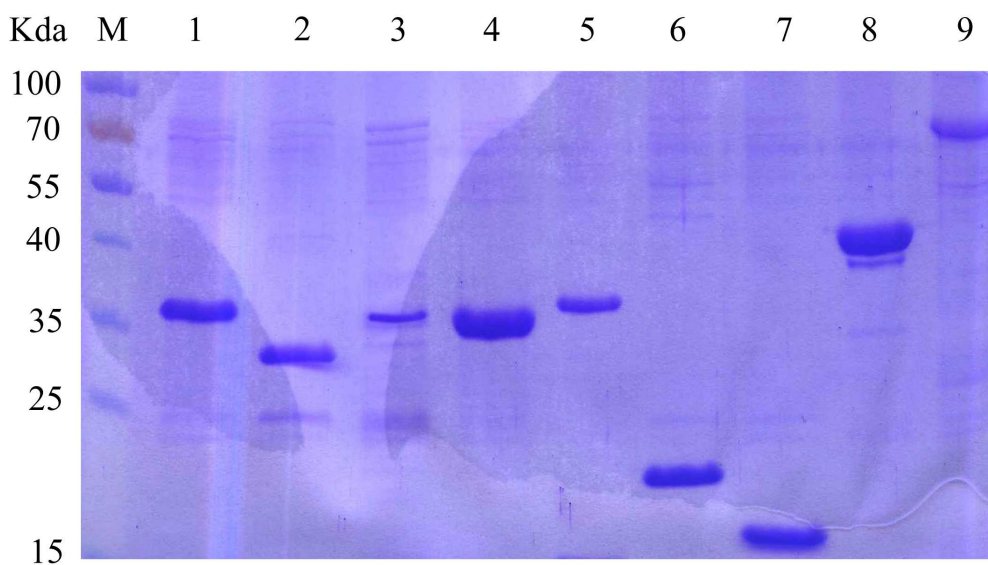

**Figure S15. Protein phosphatases quality assurance.**

M: SDS-PAGE Protein Marker;

Lane 1: Lyp protein;

Lane 2: PTPN18 protein;

Lane 3: STEP protein;

Lane 4: MEG2 protein;

Lane 5: PTP1B protein;

Lane 6: VHR protein;

Lane 7: SSH2 protein;

Lane 8: PPM1A protein;

Lane 9: PPM1G protein.

## 14. $^1\text{H}$ NMR spectra for selected compounds.

### Compound A2

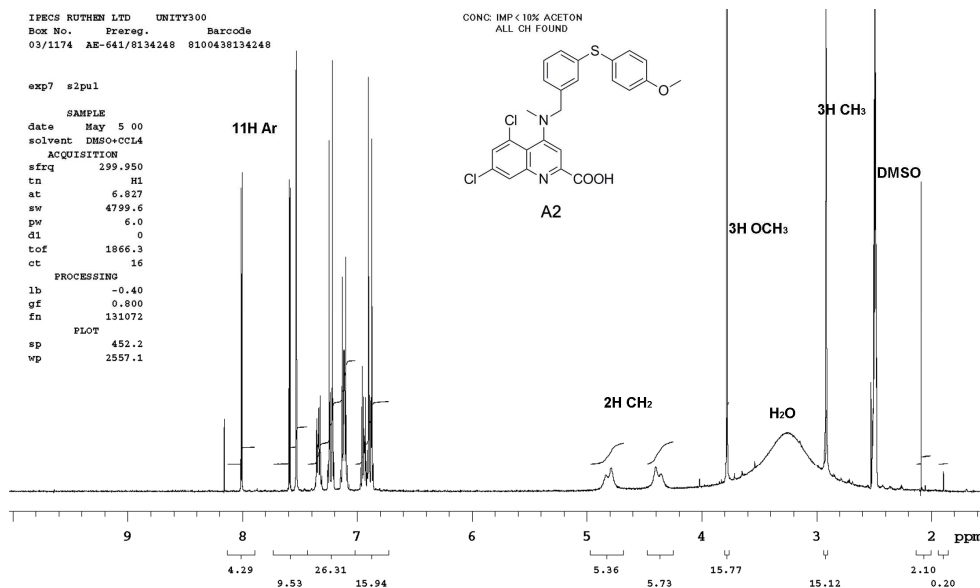

### Compound A3

SPECS and BioSPECS B.V.

41409126  
 STANDARD 1H OBSERVE  
 SPECS and BioSPECS  
 Pulse Sequence: s2pul  
 Solvent: dmsd  
 Temp. 30.0 C / 303.1 K  
 Sample #3  
 File: 4140912601  
 Mercury-400BB "nmrdelft"  
 PULSE SEQUENCE  
 Relax. delay 5.000 sec  
 Pulse 60.0 degrees  
 Acq. time 1.999 sec  
 Width 6398.0 Hz  
 16 repetitions  
 OBSERVE H1, 399.9896647 MHz  
 DATA PROCESSING  
 Line broadening 0.1 Hz  
 FT size 65536  
 Total time 2 min, 2 sec

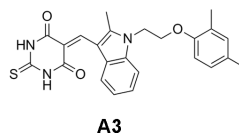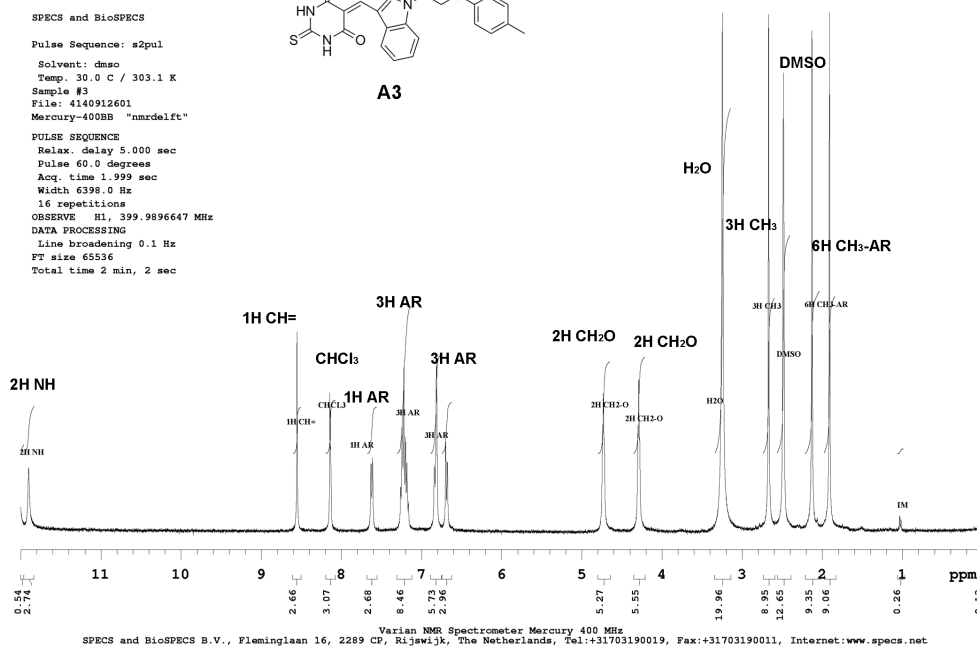



## Compound A6

SPECS and BioSPECS B.V.

Date: Sat Sep 28, 2002

13177206  
STANDARD 1H OBSERVE  
SPECS and BioSPECS  
Pulse Sequence: s2pul  
Solvent: dmsc  
Ambient temperature  
Sample #1  
File: 1317720601  
Mercury-400BB "nmrdelt"  
PULSE SEQUENCE  
Relax. delay 5.000 sec  
Pulse 60.0 degrees  
Acq. time 1.999 sec  
Width 6398.0 Hz  
16 repetitions  
OBSERVE H1, 399.9896647 MHz  
DATA PROCESSING  
Line broadening 0.1 Hz  
FT size 65536  
Total time 2 min, 2 sec

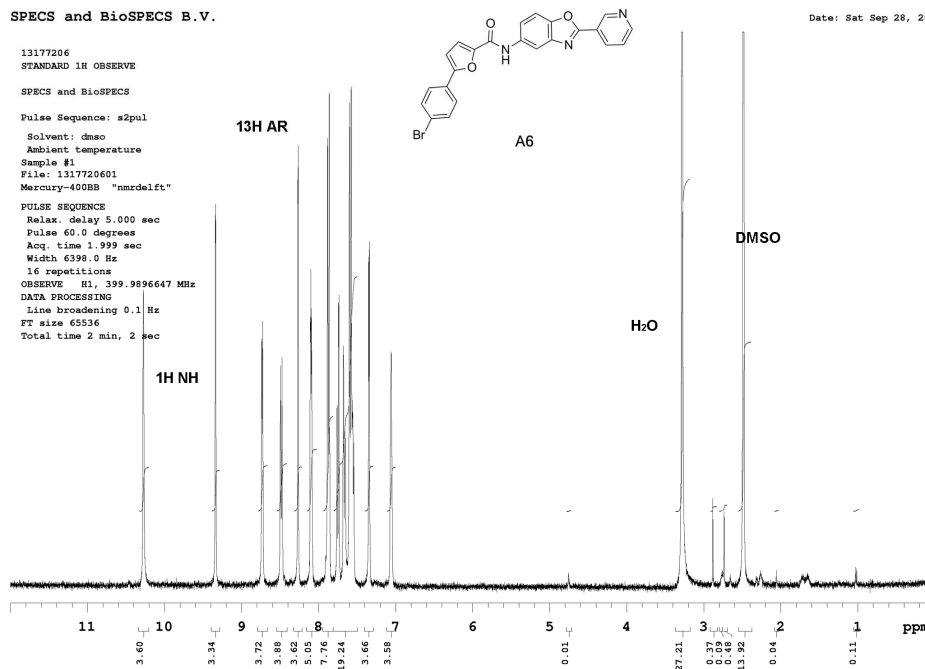

Varian NMR Spectrometer Mercury 400 MHz  
SPECS and BioSPECS B.V., Fleminglaan 16, 2289 CP, Rijswijk, The Netherlands, Tel: +31703190019, Fax: +31703190011, Internet: www.specs.net

## Compound A15

SPECS and BioSPECS B.V.

15385001  
STANDARD 1H OBSERVE  
SPECS and BioSPECS  
Pulse Sequence: s2pul  
Solvent: dmsc  
Temp. 30.0 C / 303.1 K  
Sample #64  
File: 1538500101  
Mercury-400BB "nmrdelt"  
PULSE SEQUENCE  
Relax. delay 5.000 sec  
Pulse 60.0 degrees  
Acq. time 1.999 sec  
Width 6398.0 Hz  
16 repetitions  
OBSERVE H1, 399.9896647 MHz  
DATA PROCESSING  
Line broadening 0.1 Hz  
FT size 65536  
Total time 2 min, 2 sec

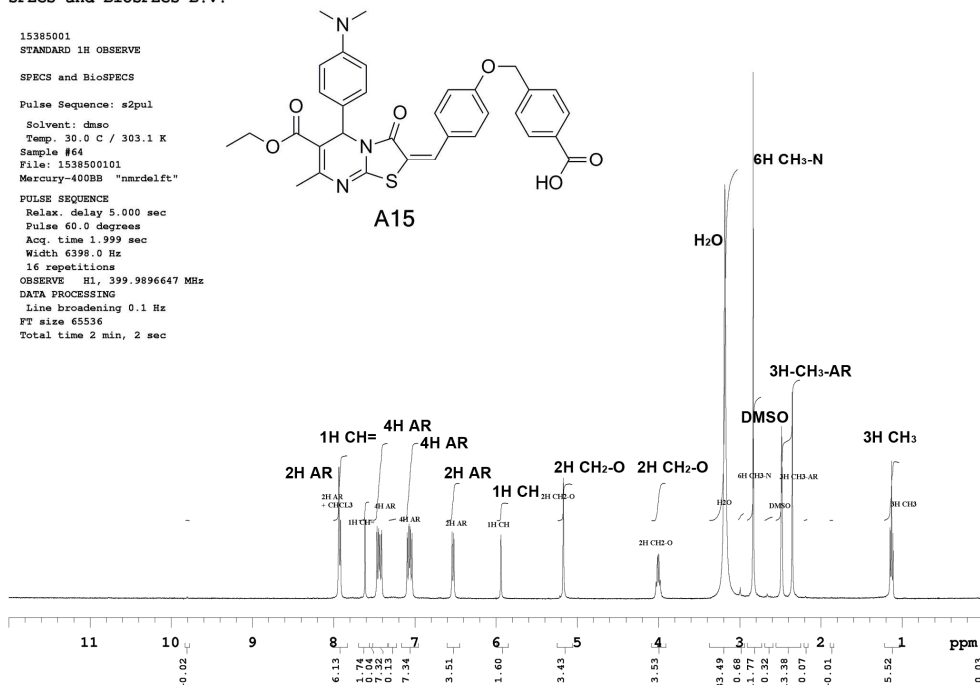

Varian NMR Spectrometer Mercury 400 MHz  
SPECS and BioSPECS B.V., Fleminglaan 16, 2289 CP, Rijswijk, The Netherlands, Tel: +31703190019, Fax: +31703190011, Internet: www.specs.net

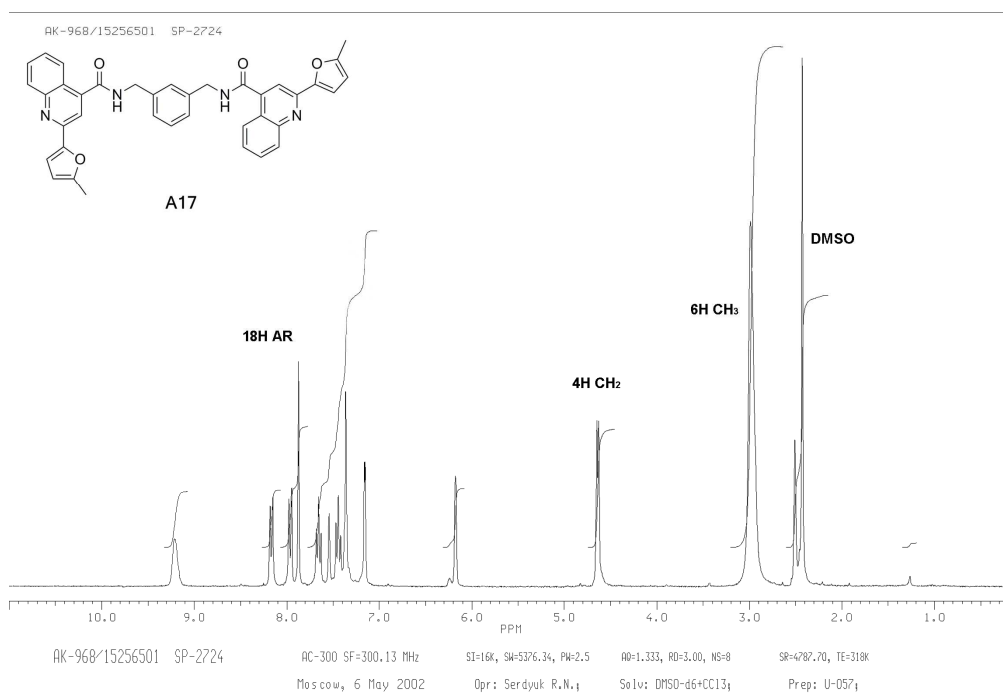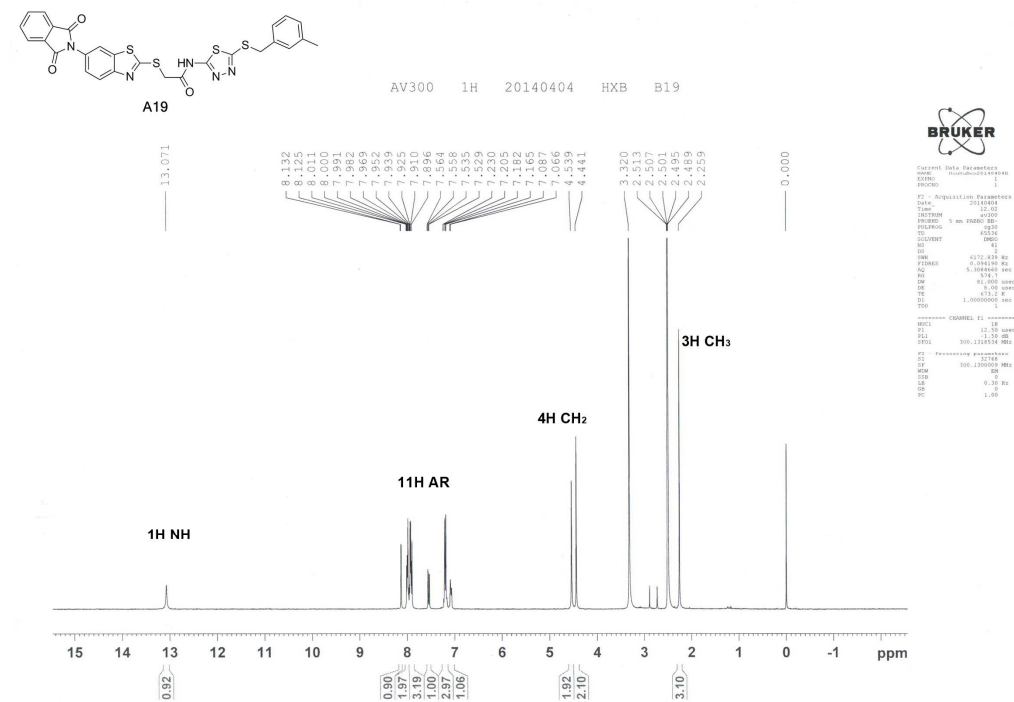

## Compound A22

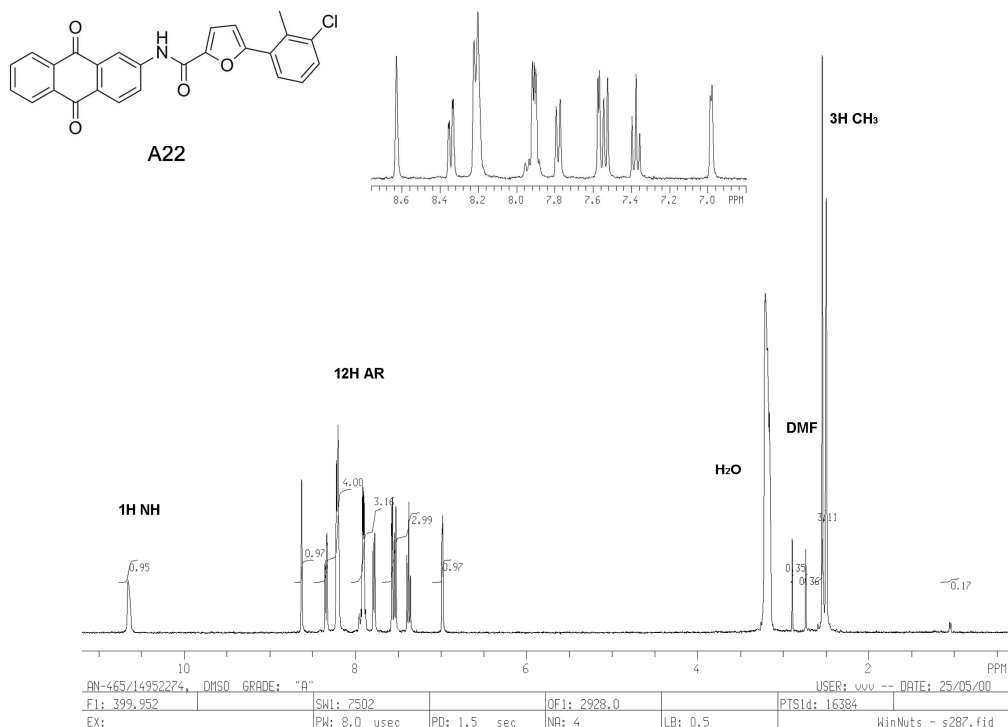

## Compound A25

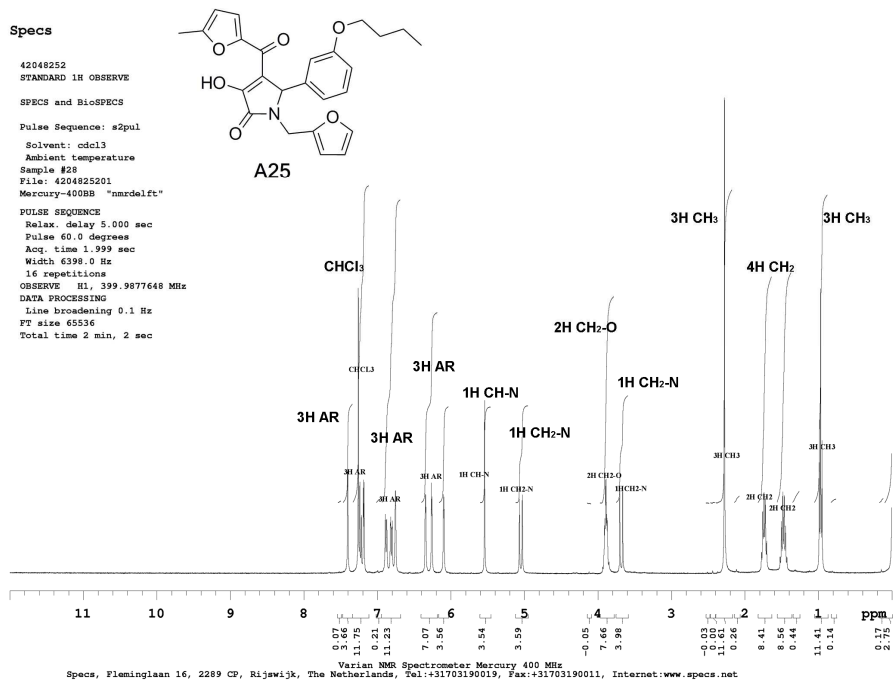

## Compound A26

### Specs

42098518  
STANDARD 1H OBSERVE  
SPECS and BiosPECS  
Pulse Sequence: s2pul  
Solvent: dms  
Ambient temperature  
Sample #66  
File: 4209851801  
Mercury-400BB "nmrdelft"  
PULSE SEQUENCE  
Relax. delay 5.000 sec  
Pulse 60.0 degrees  
Acq. time 1.999 sec  
Width 6390.0 Hz  
16 repetitions  
OBSERVE H1, 399.9896647 MHz  
DATA PROCESSING  
Line broadening 0.1 Hz  
FT size 65536  
Total time 2 min, 2 sec

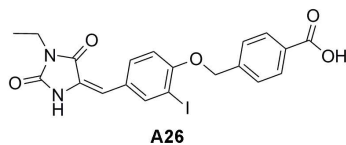

Date: Sat Apr 12, 2003

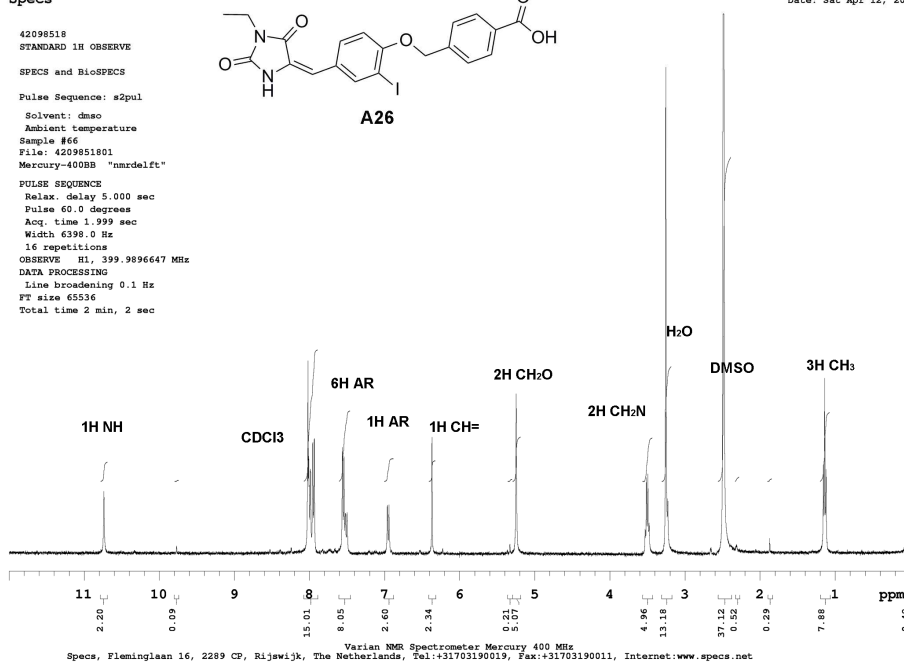

## Compound A15-1

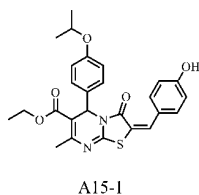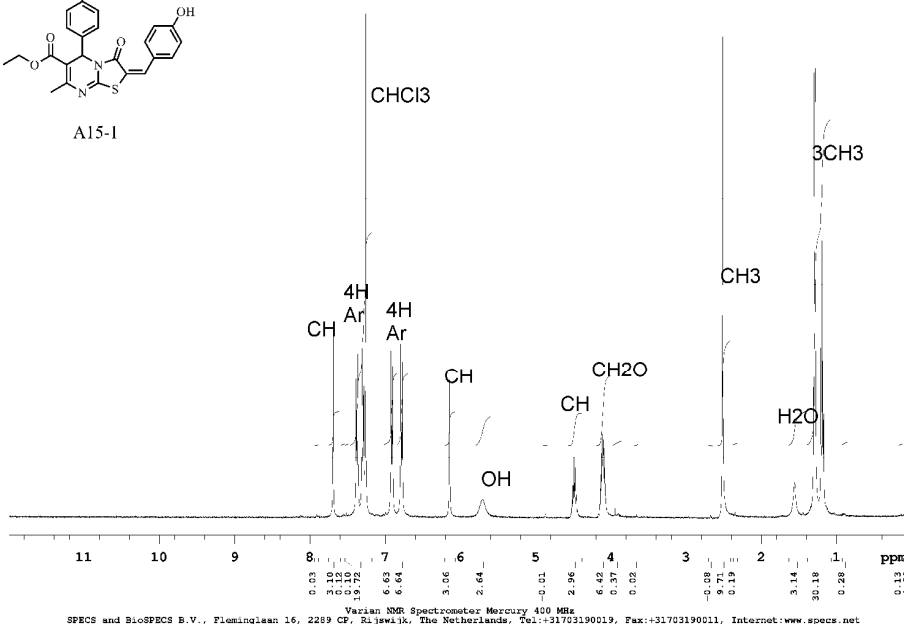

## Compound A15-2

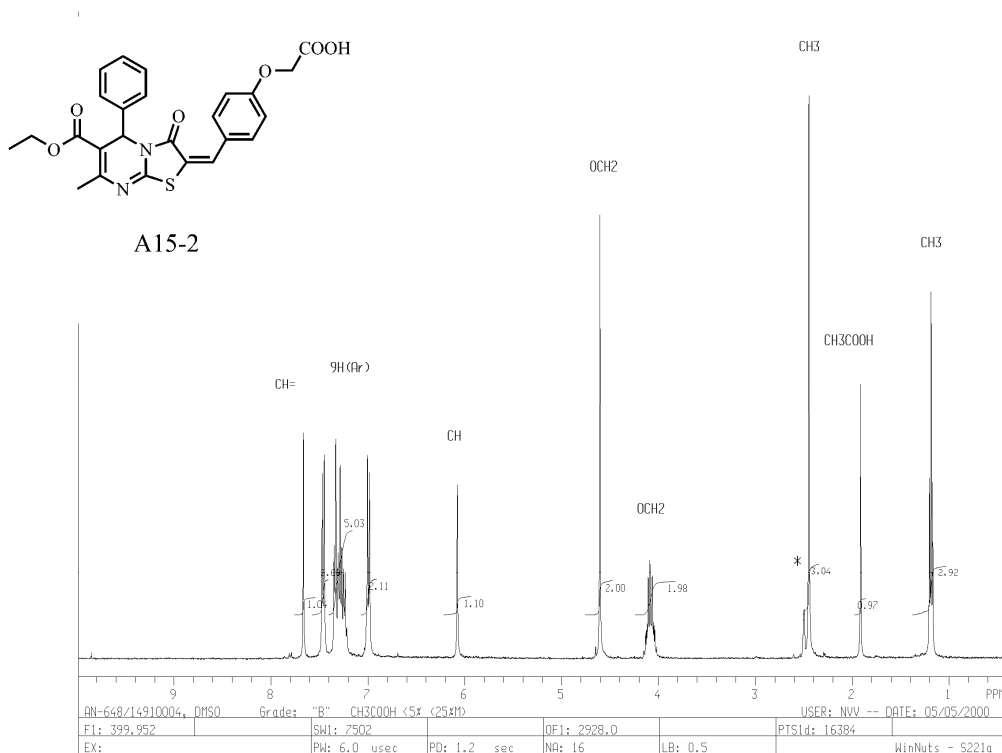

## Compound A15-3

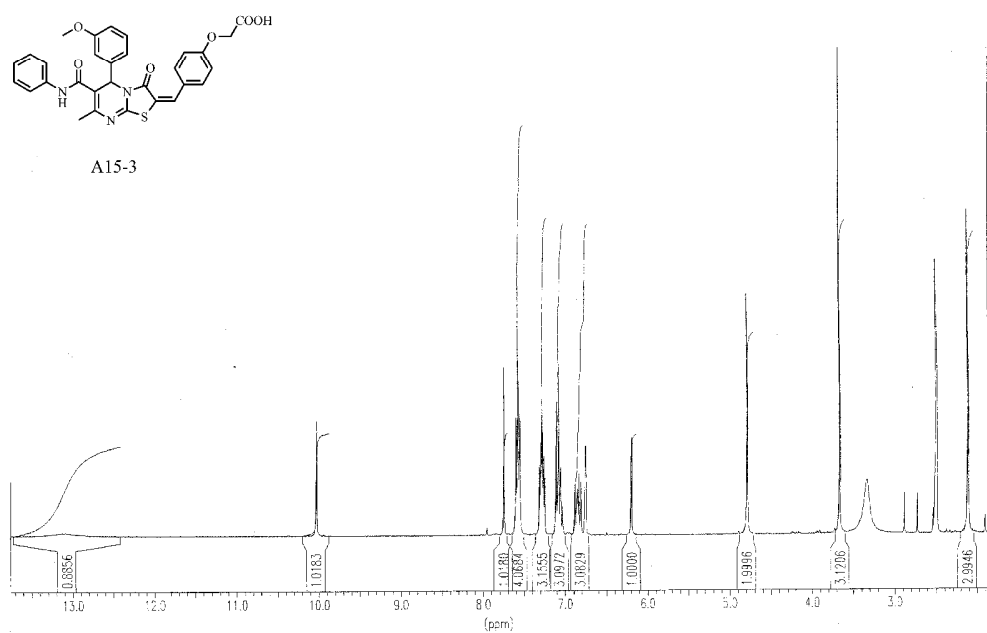

## Compound A15-5

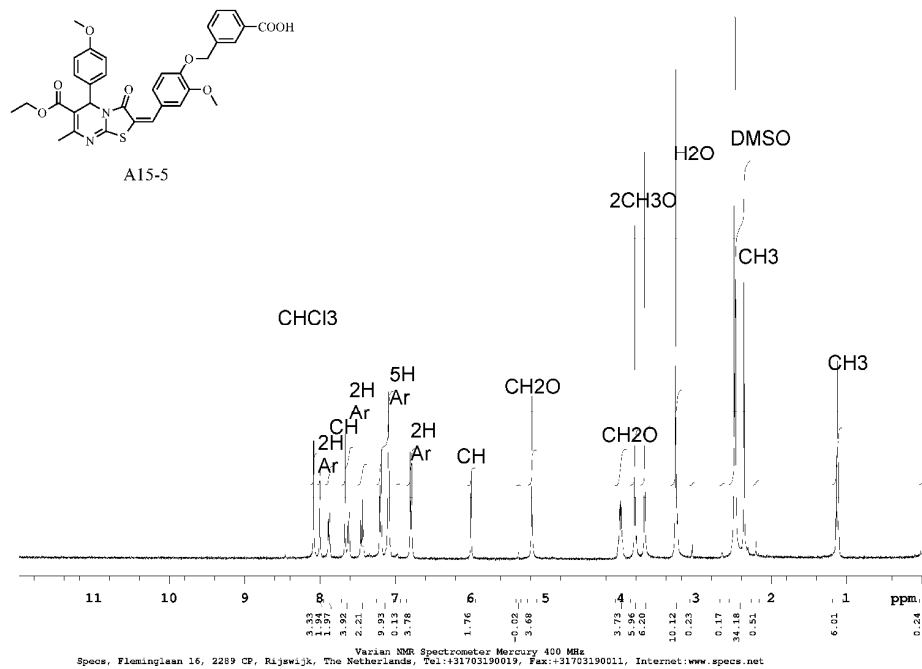

## Compound A19-1

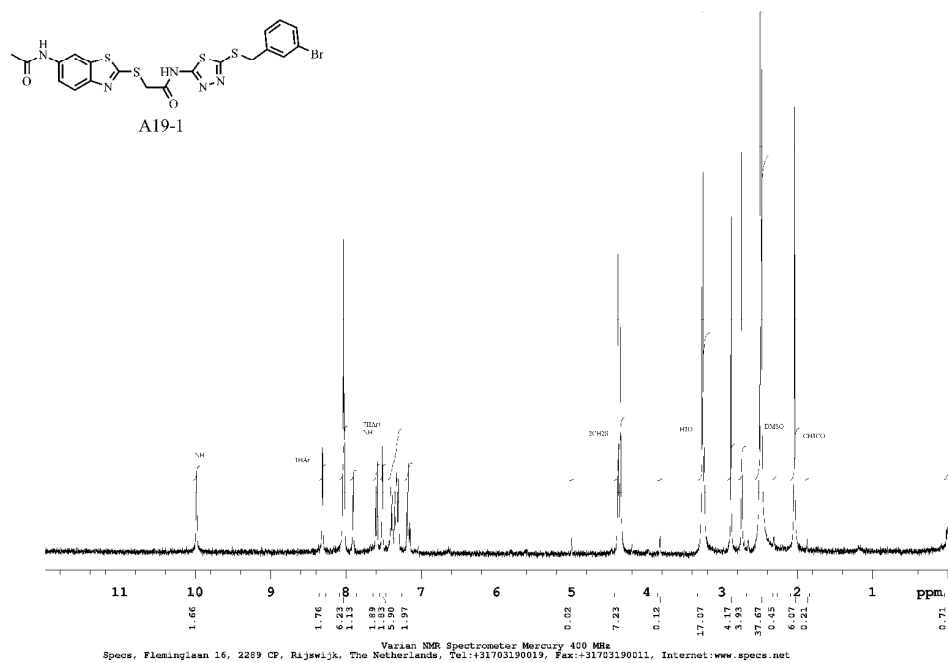

## Compound A19-2

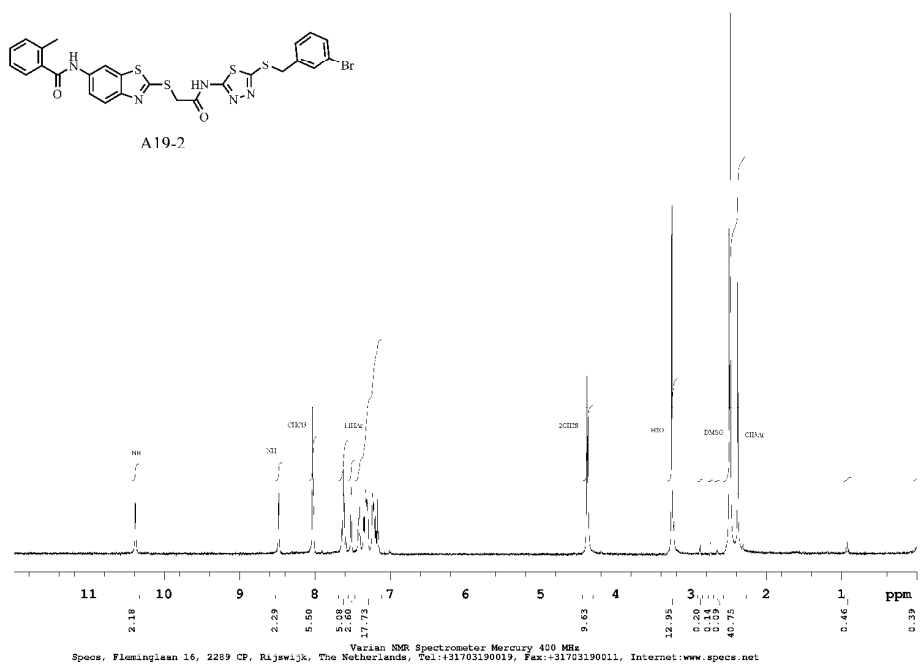

## Compound A19-3

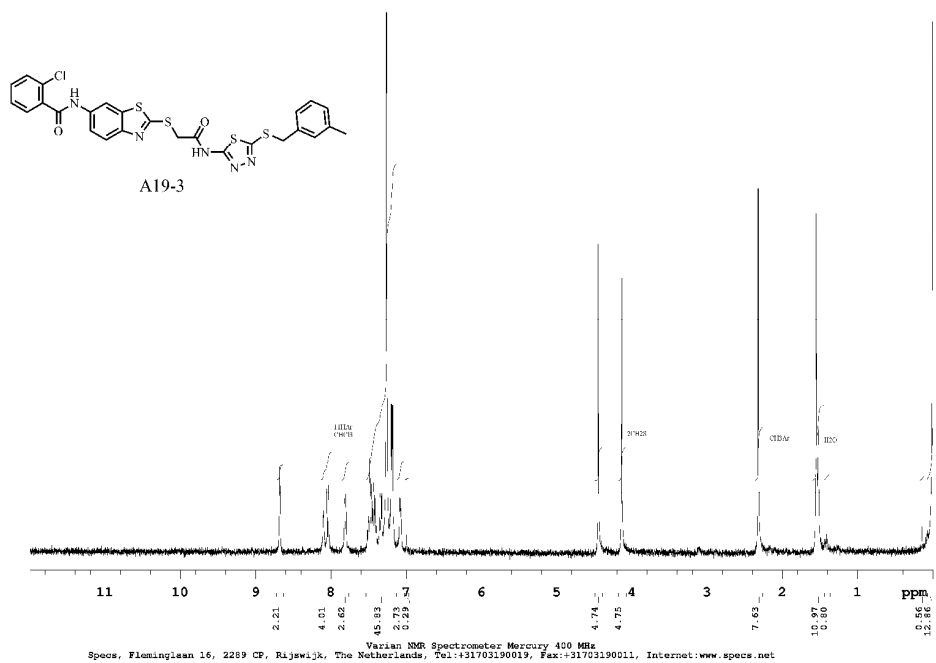

## Compound A19-4

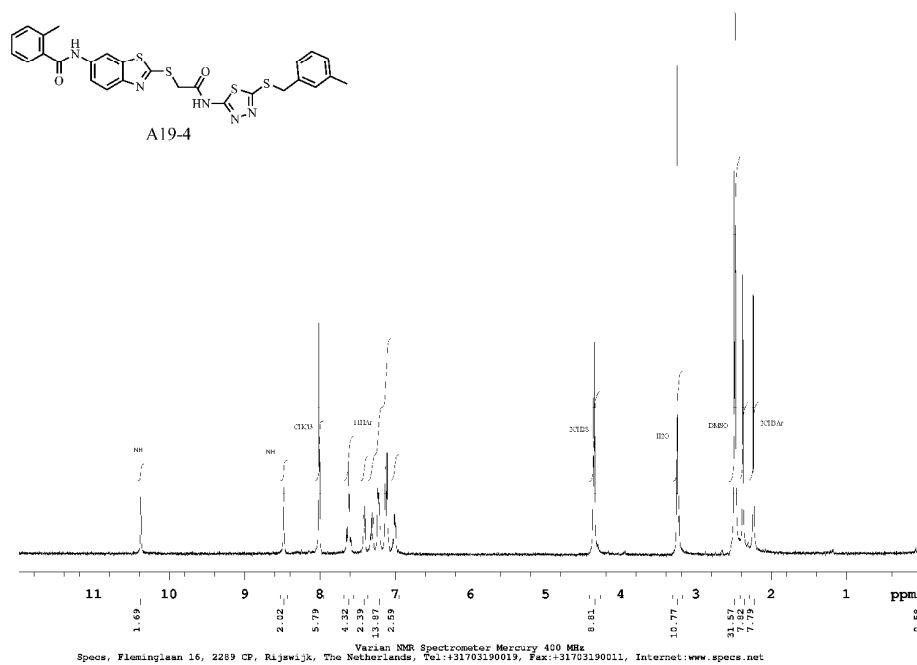

## Compound A19-6

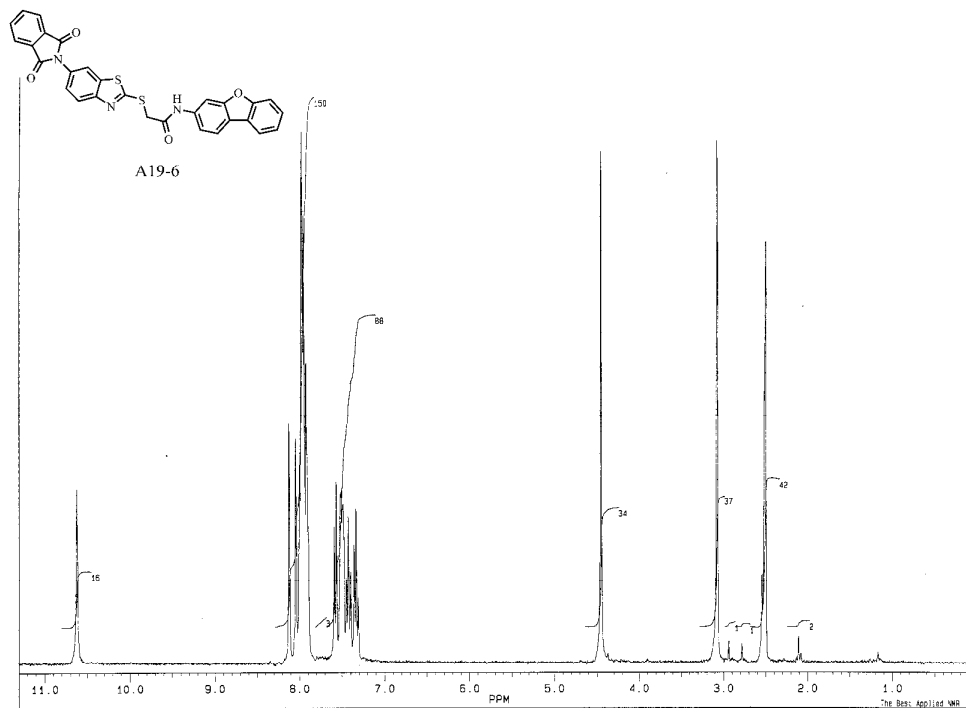



## References

1. He, Y.; Liu, S.; Menon, A.; Stanford, S.; Oppong, E.; Gunawan, A. M.; Wu, L.; Wu, D. J.; Barrios, A. M.; Bottini, N.; Cato, A. C.; Zhang, Z. Y. A potent and selective small-molecule inhibitor for the lymphoid-specific tyrosine phosphatase (LYP), a target associated with autoimmune diseases. *J Med Chem* **2013**, 56, 4990-5008.
2. Yu, X.; Sun, J. P.; He, Y.; Guo, X.; Liu, S.; Zhou, B.; Hudmon, A.; Zhang, Z. Y. Structure, inhibitor, and regulatory mechanism of Lyp, a lymphoid-specific tyrosine phosphatase implicated in autoimmune diseases. *Proc Natl Acad Sci U S A* **2007**, 104, 19767-72.
3. Vang, T.; Liu, W. H.; Delacroix, L.; Wu, S.; Vasile, S.; Dahl, R.; Yang, L.; Musumeci, L.; Francis, D.; Landskron, J.; Tasken, K.; Tremblay, M. L.; Lie, B. A.; Page, R.; Mustelin, T.; Rahmouni, S.; Rickert, R. C.; Tautz, L. LYP inhibits T-cell activation when dissociated from CSK. *Nat Chem Biol* **2012**, 8, 437-46.
4. Stanford, S. M.; Krishnamurthy, D.; Falk, M. D.; Messina, R.; Debnath, B.; Li, S.; Liu, T.; Kazemi, R.; Dahl, R.; He, Y.; Yu, X.; Chan, A. C.; Zhang, Z. Y.; Barrios, A. M.; Woods, V. L., Jr.; Neamati, N.; Bottini, N. Discovery of a novel series of inhibitors of lymphoid tyrosine phosphatase with activity in human T cells. *J Med Chem* **2011**, 54, 1640-54.
5. Baldi, P.; Hirschberg, D. S. An intersection inequality sharper than the tanimoto triangle inequality for efficiently searching large databases. *J Chem Inf Model* **2009**, 49, 1866-70.
6. Godden, J. W.; Xue, L.; Bajorath, J. Combinatorial preferences affect molecular similarity/diversity calculations using binary fingerprints and Tanimoto coefficients. *J Chem Inf Comput Sci* **2000**, 40, 163-6.
7. Salim, N.; Holliday, J.; Willett, P. Combination of fingerprint-based similarity coefficients using data fusion. *J Chem Inf Comput Sci* **2003**, 43, 435-42.
8. Cheng, T.; Zhao, Y.; Li, X.; Lin, F.; Xu, Y.; Zhang, X.; Li, Y.; Wang, R.; Lai, L. Computation of octanol-water partition coefficients by guiding an additive model with knowledge. *J Chem Inf Model* **2007**, 47, 2140-8.
9. Tautz, L.; Mustelin, T. Strategies for developing protein tyrosine phosphatase inhibitors. *Methods* **2007**, 42, 250-60.
10. Liu, S.; Zhou, B.; Yang, H.; He, Y.; Jiang, Z. X.; Kumar, S.; Wu, L.; Zhang, Z. Y. Aryl vinyl sulfonates and sulfones as active site-directed and mechanism-based probes for protein tyrosine phosphatases. *J Am Chem Soc* **2008**, 130, 8251-60.
